# Supplementary material for: Different solvates of two isomeric dicarboxylic acids with pyridine and quinoline
Source: Royal Society of Chemistry journal article supplement (doi:10.1039/b911084d), 2009-01-01
Supplement: b911084d.pdf [file b911084d.pdf]

**Supplementary materials:**

**Different solvates of two isomeric dicarboxylic acids with pyridine and quinoline**

**Devendra Singh and Jubaraj B. Baruah\***

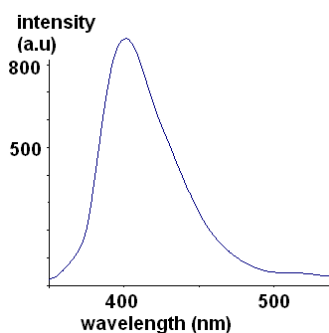

Supplementary Figure 1: Fluorescence emission of **A** in DMSO ( $1.1 \times 10^{-5}$  M) ( $\lambda_{\text{ex}}$  330nm).

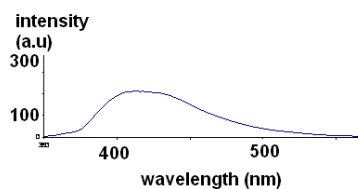

Supplementary Figure 2 : Fluorescence emission of **Aqu1** in DMSO ( $1.1 \times 10^{-5}$  M) ( $\lambda_{\text{ex}}$  330nm)..

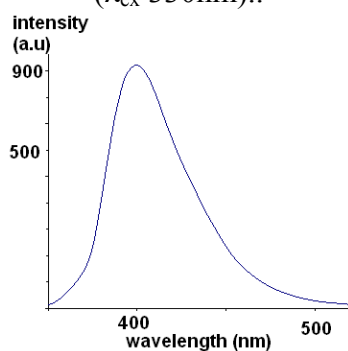

Supplementary Figure 3: Fluorescence emission of **Apy1** in DMSO ( $1.1 \times 10^{-5}$  M) ( $\lambda_{\text{ex}}$  330nm).

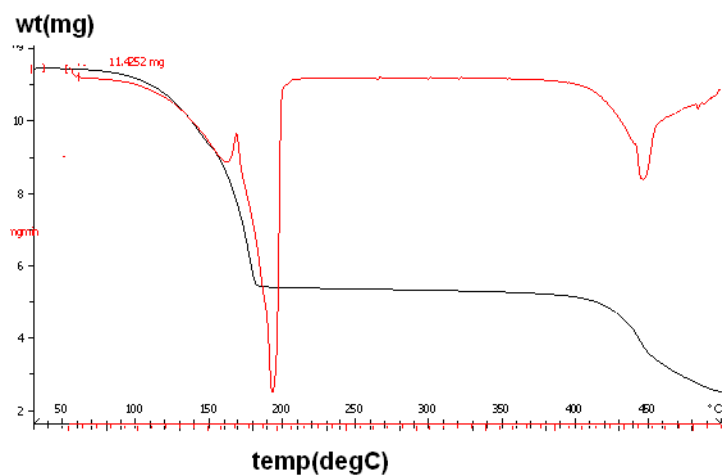

Supplementary Figure 4: Thermogram of **Aqu1** (red line is differential curve)

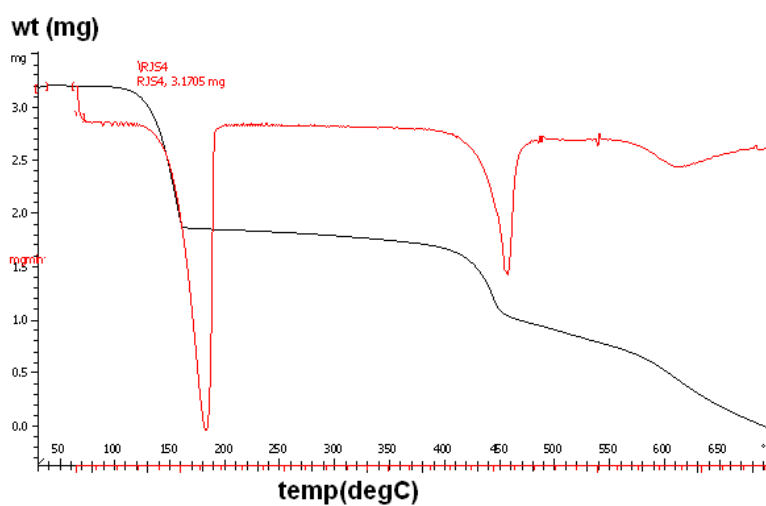

Supplementary Figure 5: Thermogram of **Aqu2** (red line is differential curve)

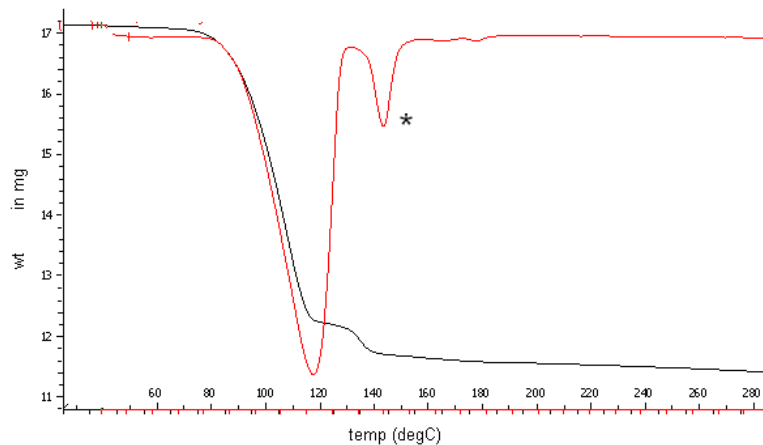

Supplementary Figure 6: Thermogram of the polymorph **Apy1** (\* loss from impurity) (red line is differential curve)

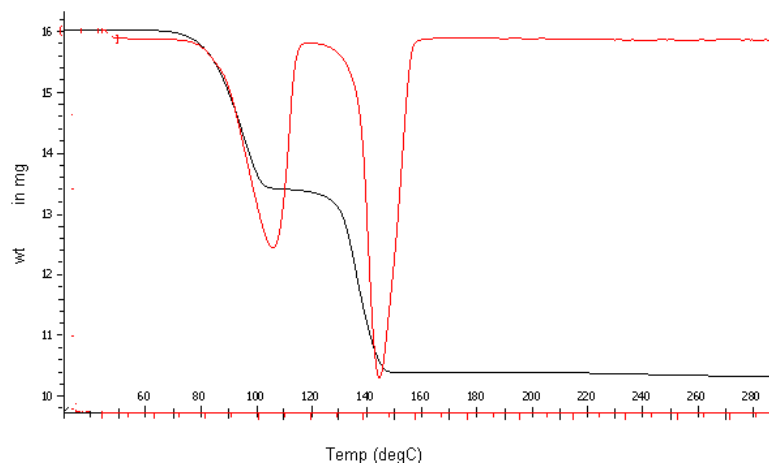

Supplementary Figure 7: Thermogram of the polymorph **Apy2** (heating rate 5°C per minute) (red line is differential curve)

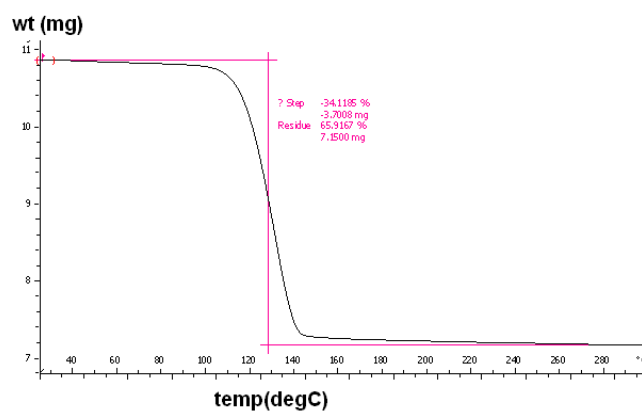

Supplementary Figure 8 : Thermogram of **Bpy**

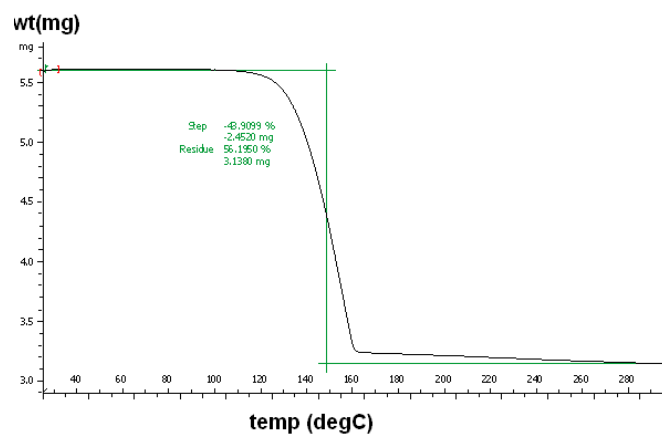

Supplementary Figure 9: Thermogram of **Bqu**
